# Supplementary material for: Comparative study on sandwich-structured SiO2@Ag@SnO2 and inverse SiO2@SnO2@Ag: key roles of shell ordering and interfacial contact in modulating the photocatalytic properties
Source: Royal Society of Chemistry journal article supplement (doi:10.1039/c5ra14336e), 2015-01-01
Supplement: c5ra14336e1.pdf [file c5ra14336e1.pdf]

Electronic Supporting Information (ESI) for

Comparative Study on Sandwich-Structured  $\text{SiO}_2@\text{Ag}@\text{SnO}_2$  and inverse  $\text{SiO}_2@\text{SnO}_2@\text{Ag}$ : Key Roles of Shell Ordering and Interfacial Contact on Modulating the Photocatalytic Properties

Menglin Sun, Qihang Zhao, Xiaoyan Liu, Chunfang Du\*, and Zhiliang Liu\*

*College of Chemistry and Chemical Engineering, Inner Mongolia University, Hohhot, Inner Mongolia 010021, P. R. China*

\*Corresponding author. Tel.: +86-471-4995414; Fax: +86-471-4995414.

E-mail address: cedchf@imu.edu.cn (C. Du), cezliu@imu.edu.cn (Z. Liu).

**ESI-1**

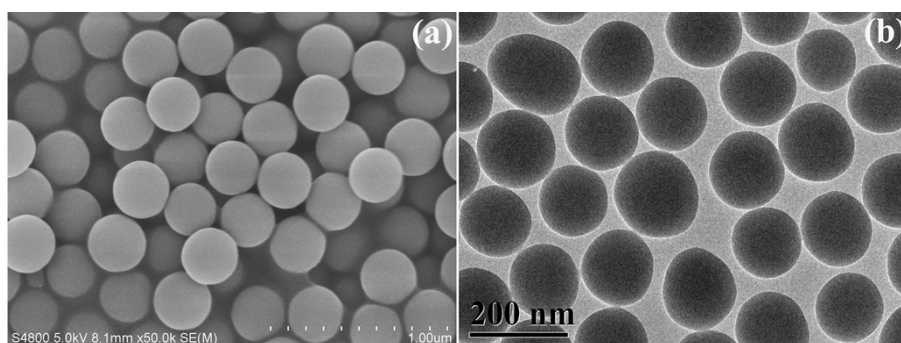

Fig.S1 SEM (a) and TEM (b) of SiO<sub>2</sub> spheres

**ESI-2**

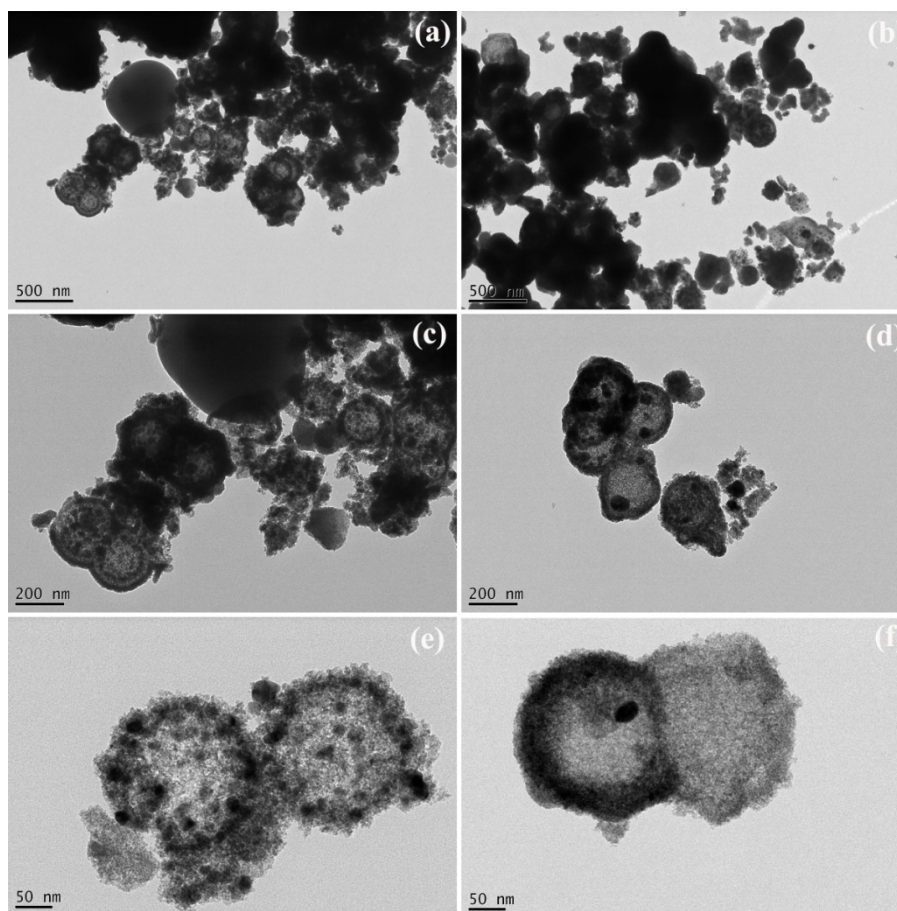

Fig.S2 TEM images of SiO<sub>2</sub>@Ag@SnO<sub>2</sub> with two SnO<sub>2</sub> layers (a, c, e) and three SnO<sub>2</sub> layers (b, d, f)

ESI-3

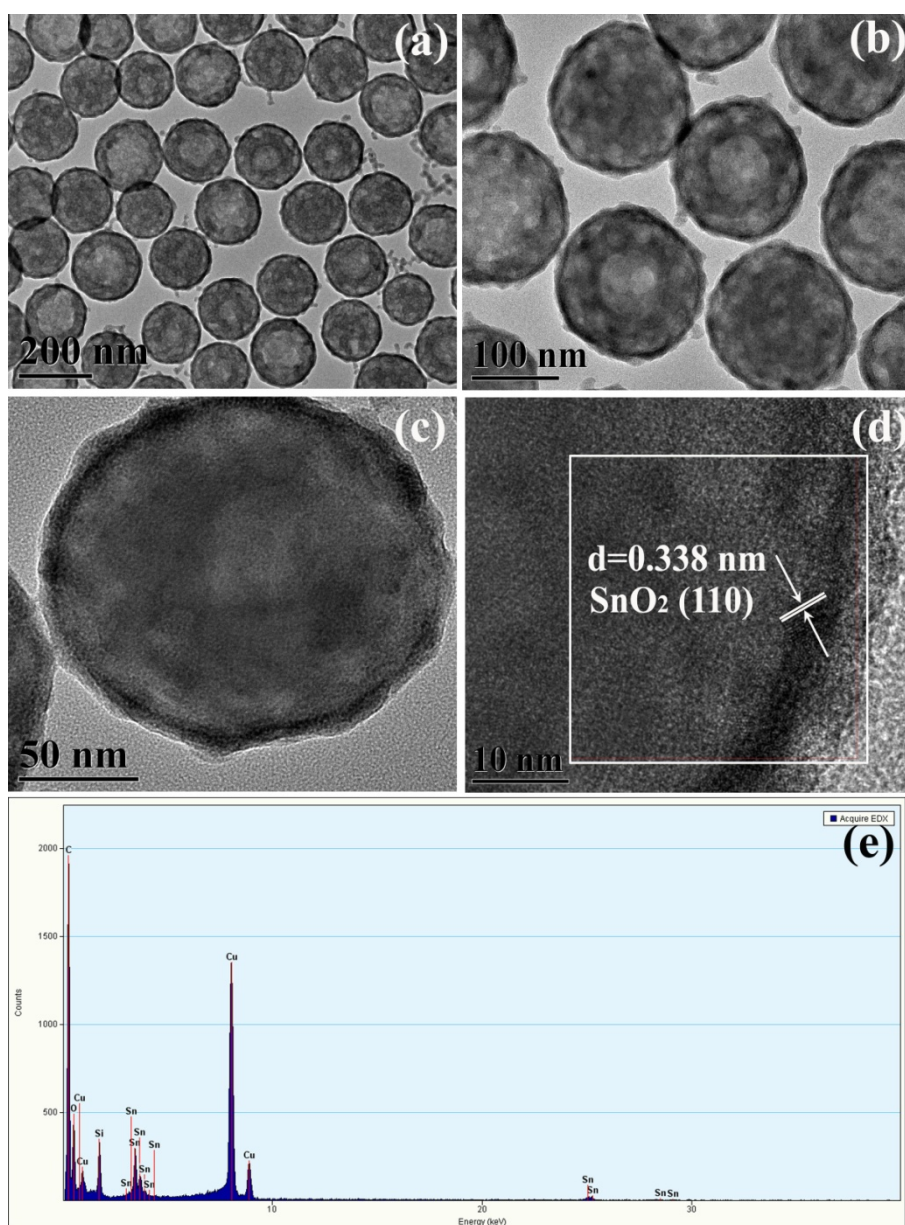

Fig.S3 TEM, HRTEM images and EDS spectrum of  $\text{SiO}_2@\text{SnO}_2$ -1

#### ESI-4

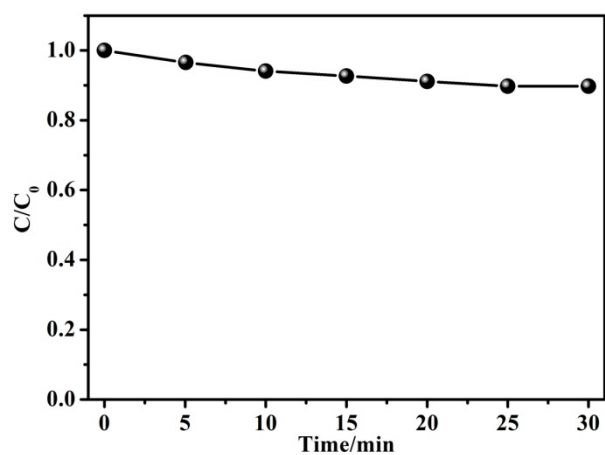

Fig.S4 Photocatalysis profile of RhB without catalyst under UV light irradiation

#### ESI-5

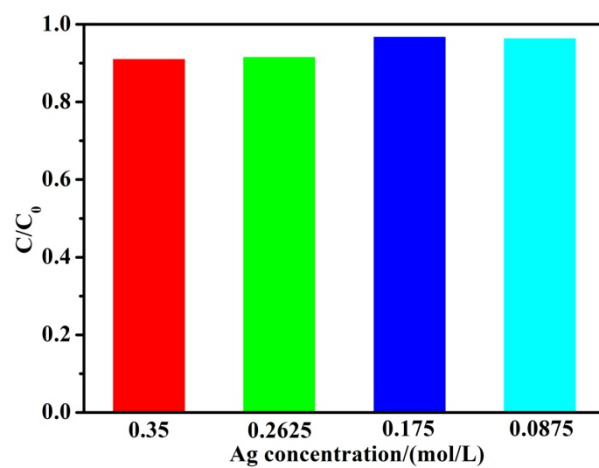

Fig.S5 Photocatalysis profiles of RhB over  $\text{SiO}_2@\text{Ag}$  with different Ag concentrations within 30 min under UV light irradiation

## ESI-6

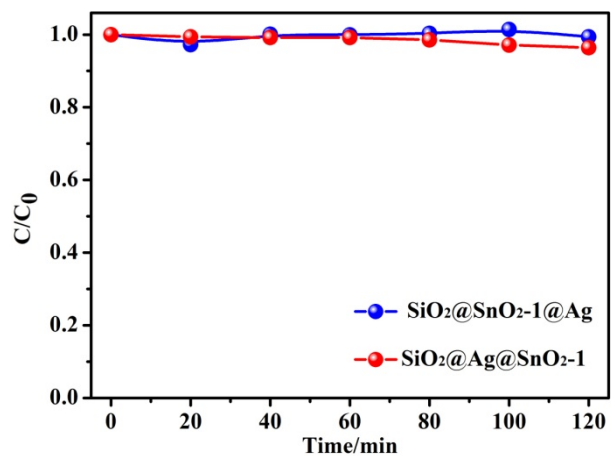

Fig.S6 Photocatalysis profiles of RhB over SiO<sub>2</sub>@SnO<sub>2</sub>-1@Ag and SiO<sub>2</sub>@Ag@SnO<sub>2</sub>-1 under visible light irradiation

ESI-7

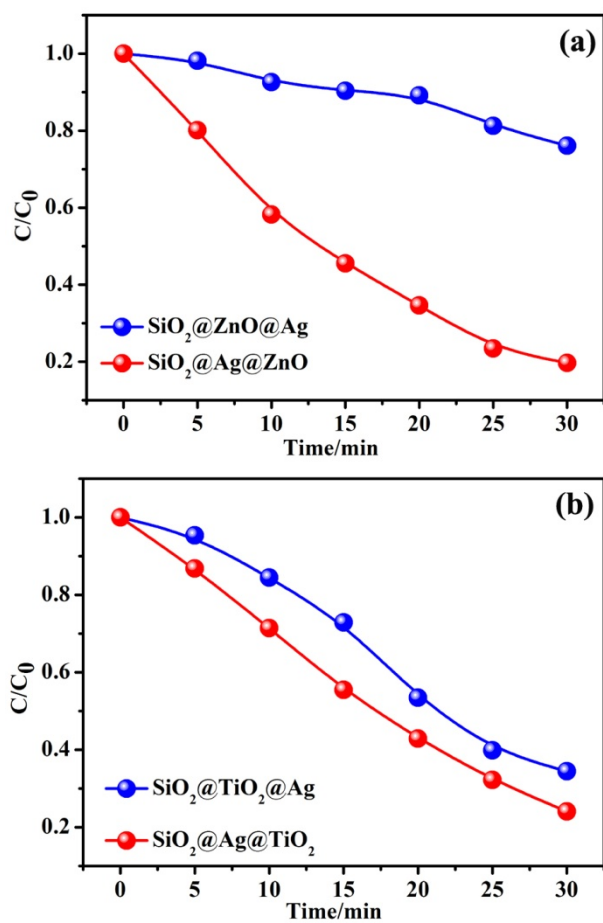

Fig.S7 Photocatalysis profiles of RhB over  $\text{SiO}_2@\text{ZnO}@\text{Ag}$  and  $\text{SiO}_2@\text{Ag}@\text{ZnO}$  (a) as well as  $\text{SiO}_2@\text{TiO}_2@\text{Ag}$  and  $\text{SiO}_2@\text{Ag}@\text{TiO}_2$  (b) under UV light irradiation

**ESI-8**

Table 1 Some parameters for various samples

| Samples                                  | $S_{\text{BET}}(\text{m}^2 \cdot \text{g}^{-1})$ | $V_{\text{T}}(\text{cm}^3 \cdot \text{g}^{-1})$ | $k(\text{min}^{-1})$ | $R^2$  | $k/S(\text{g} \cdot \text{m}^{-2} \cdot \text{min}^{-1})$ |
|------------------------------------------|--------------------------------------------------|-------------------------------------------------|----------------------|--------|-----------------------------------------------------------|
| SiO <sub>2</sub> @Ag                     | -                                                | -                                               | 0.0026               | 0.9247 |                                                           |
| SiO <sub>2</sub> @ SnO <sub>2</sub> -1   | -                                                | -                                               | 0.0172               | 0.9941 |                                                           |
| SiO <sub>2</sub> @SnO <sub>2</sub> -1@Ag | 9.3                                              | 0.023                                           | 0.0033               | 0.9939 | $3.55 \times 10^{-4}$                                     |
| SiO <sub>2</sub> @Ag@SnO <sub>2</sub> -1 | 18.0                                             | 0.048                                           | 0.1007               | 0.9991 | $5.59 \times 10^{-3}$                                     |
| SiO <sub>2</sub> @Ag@SnO <sub>2</sub> -2 | -                                                | -                                               | 0.0991               | 0.9971 | -                                                         |
| SiO <sub>2</sub> @Ag@SnO <sub>2</sub> -3 | -                                                | -                                               | 0.0805               | 0.9946 | -                                                         |
